# Supplementary material for: High-Efficiency Transduction of Primary Human Hematopoietic Stem/Progenitor Cells by AAV6 Vectors: Strategies for Overcoming Donor-Variation and Implications in Genome Editing
Source: PubMed Central journal article supplement (PMC5069717; doi:10.1038/srep35495), 2016-10-19
Supplement: srep35495-s1.pdf [file srep35495-s1.pdf]

## SUPPLEMENTARY INFORMATION

### High-Efficiency Transduction of Primary Human Hematopoietic Stem/Progenitor Cells by AAV6 Vectors: Strategies for Overcoming Donor-Variation and Implications in Genome Editing

Chen Ling<sup>1,2†</sup>, Kanit Bhukhai<sup>3†</sup>, Zifei Yin<sup>1,2,4†</sup>, Mengqun Tan<sup>5</sup>, Mervin C. Yoder<sup>6</sup>, Philippe Leboulch<sup>3\*</sup>, Emmanuel Payen<sup>3\*</sup>, and Arun Srivastava<sup>1,2,7\*</sup>

<sup>1</sup>Division of Cellular and Molecular Therapy, Department of Pediatrics; <sup>2</sup>Powell Gene Therapy Center; University of Florida College of Medicine, Gainesville, FL, USA; <sup>3</sup>CEA/Paris Sud University (UMR-E 007), Institute of Emerging Diseases and Innovative Therapies (iMETI), Fontenay-aux-Roses, France; <sup>4</sup>Department of Traditional Chinese Medicine, Second Military Medical University, Shanghai, China; <sup>5</sup>Department of Physiology, Xiang-Ya School of Medicine, Central South University, Changsha, China; <sup>6</sup>Herman B Well Center for Pediatrics Research, Indiana University School of Medicine, Indianapolis, IN, USA; <sup>7</sup>Department of Molecular Genetics & Microbiology; University of Florida College of Medicine, Gainesville, FL, USA

<sup>†</sup>These authors contributed equally to this work

\*Corresponding authors:

Arun Srivastava, PhD

Division of Cellular and Molecular Therapy, Departments of Pediatrics, Molecular Genetics & Microbiology, Powell Gene Therapy Center, Cancer and Genetics Research Complex, 2033 Mowry Road, Room 492-A, University of Florida College of Medicine, Gainesville, FL 32611-3633; USA; E-mail: [aruns@peds.ufl.edu](mailto:aruns@peds.ufl.edu); Phone: 352-273-8259; Fax: 352-273-8342

Emmanuel Payen, PhD

CEA de Fontenay aux Roses, Institut des Maladies Emergentes et des Thérapies Innovantes, 18, route du Panorama - BP6, 92265 Fontenay aux Roses Cedex, FRANCE; E-mail: [emmanuel.payen@cea.fr](mailto:emmanuel.payen@cea.fr); Phone: + 33 146547055; Fax: +33 1 46547499

Philippe Leboulch, MD, PhD

CEA de Fontenay aux Roses, Institut des Maladies Emergentes et des Thérapies Innovantes, , 18 route du Panorama - BP6, 92265 Fontenay-aux-Roses, FRANCE; E-mail: [pleboulch@rics.bwh.harvard.edu](mailto:pleboulch@rics.bwh.harvard.edu); Phone: +33 1 46548349; Fax: +33 1 46547499

41 **Supplementary Figures**

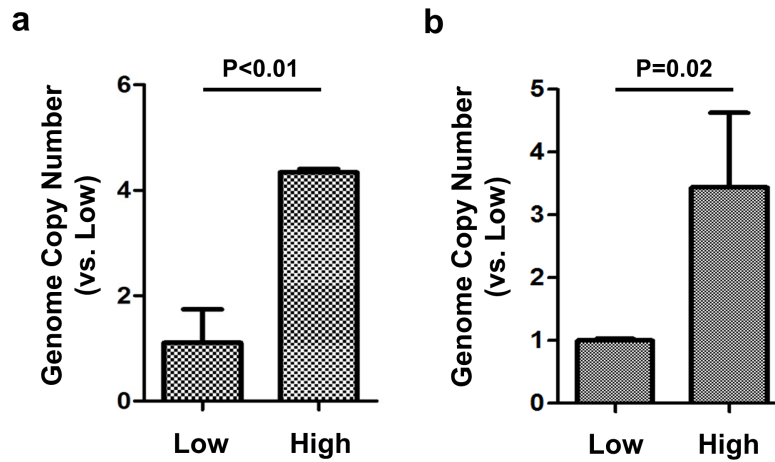

42

43

**Supplementary Figure 1**

44

45 **Supplementary Figure 1. AAV vector genome copy numbers.** Total DNAs were isolated from (a)  
46 K562 cells and (b) primary CD34<sup>+</sup> cells 2 hrs post-transduction with ssAAV6 vectors. The vector  
47 genome copy numbers/cell were determined by qPCR and were normalized to  $\beta$ -actin DNA  
48 copy number.

49

50

51

52

53

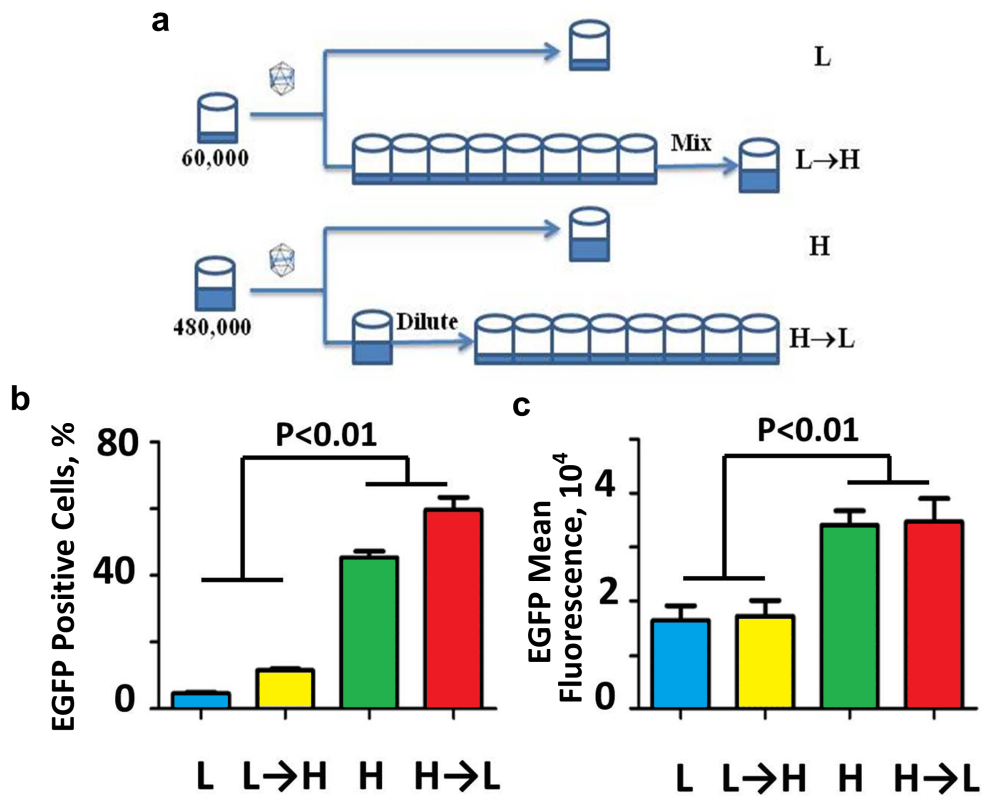

54

55

### Supplementary Figure 2

56

57 **Supplementary Figure 2. Effect of initial cell-cell contact.** (a) Schematics of the experiment  
 58 design. K562 cells (60,000 cells/50  $\mu$ l) and 8 replicate cultures were transduced at low-density  
 59 (L) with TM-sCAAV6-CBAp-EGFP vectors at an MOI of 3,000 vgs/cell for 2 hrs and subsequently  
 60 pooled together and centrifuged to reach high-density (L→H), and conversely, cells (480,000  
 61 cells/50  $\mu$ l) were transduced at high-density (H), and 2 hrs post-transduction, were diluted to  
 62 low-density (H→L). (b) Transgene expression in each cell population was analyzed by  
 63 fluorescence microscopy 48 hrs post-transduction. (c) Mean fluorescence intensity of transgene  
 64 expression.

65

66

67

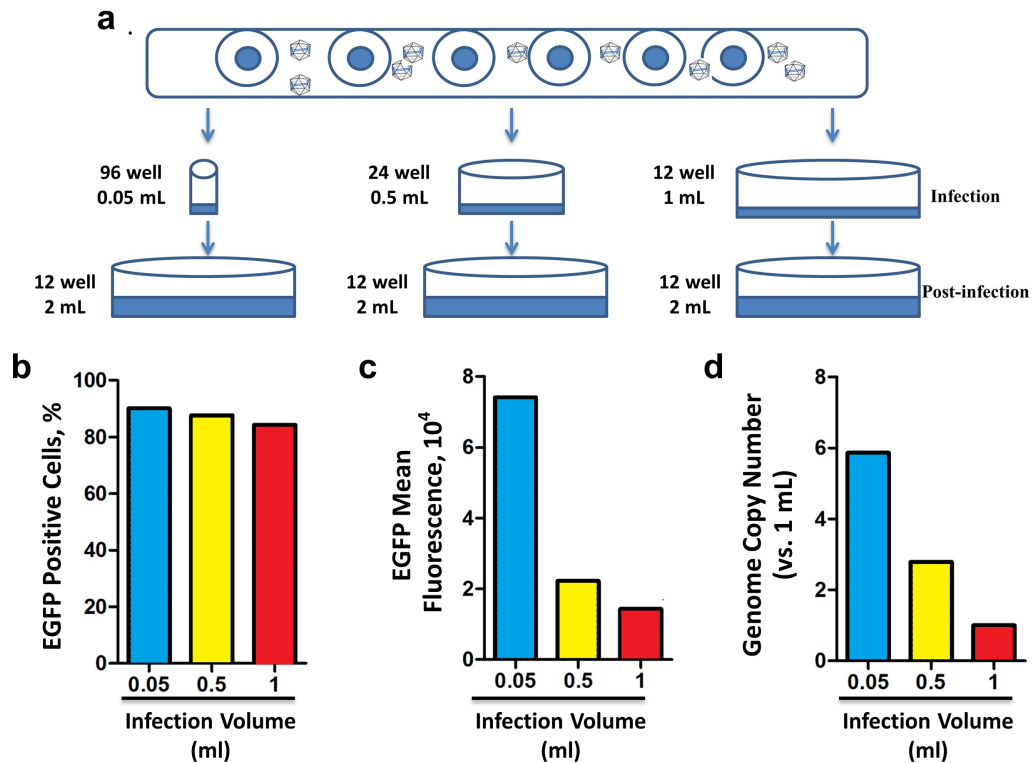

68

69

### Supplementary Figure 3

70

71 **Supplementary Figure 3. Effect of culture volume.** (a) Schematics of the experiment design. A  
 72 fixed number of K562 cells were transduced with viral vectors in various indicated volumes for 2  
 73 hrs and subsequently diluted to 2.0 ml. (b) Transgene expression in each cell population was  
 74 analyzed by flow cytometry 48 hrs post-transduction. (c) Mean fluorescence intensity of  
 75 transgene expression. (d) Vector genome copy numbers/cell were determined by qPCR and  
 76 were normalized to  $\beta$ -actin DNA copy number as described above.

77

78

79

80

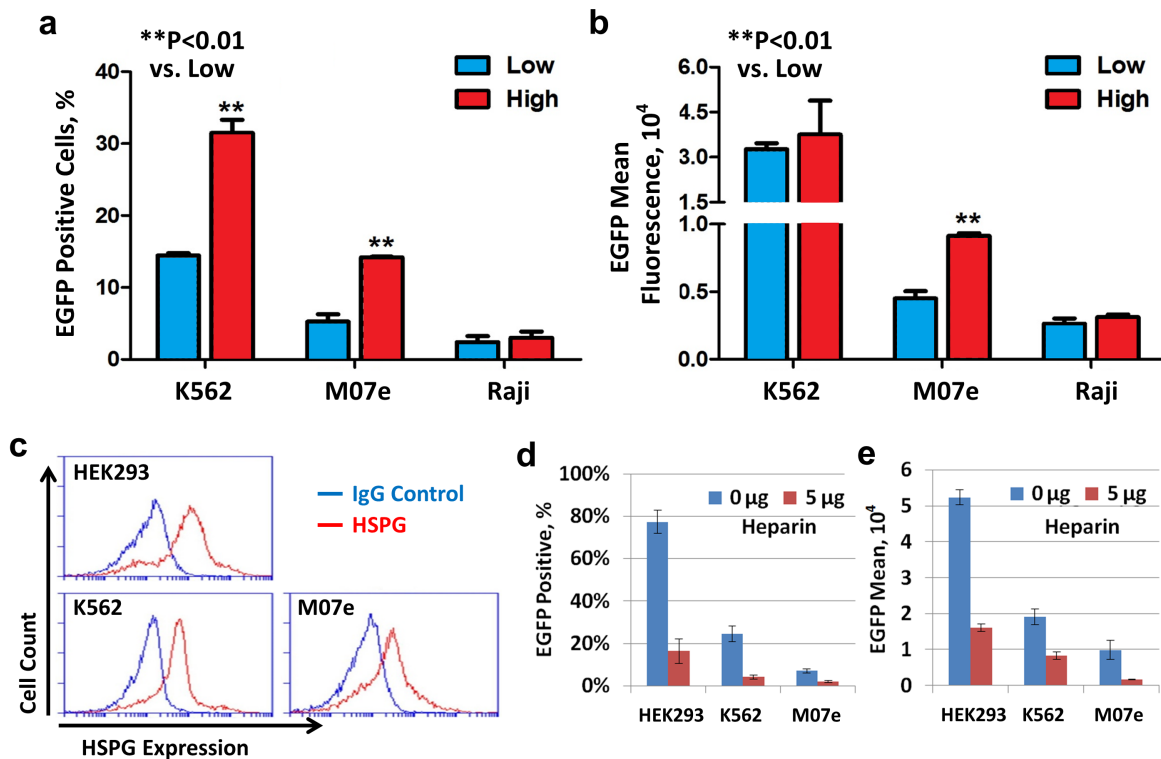

81

82

#### Supplementary Figure 4

83

84 **Supplementary Figure 4. Transduction efficiency of AAV2 vectors in various human**  
 85 **hematopoietic cell lines at low and high cell densities. (a)** Human K562, M07e, and Raji cells  
 86 were transduced with scAAV2-CBAp-EGFP vectors at an MOI of 5,000 vgs/cell at either low  
 87 ( $1 \times 10^6$  cells/ml) or high ( $1 \times 10^7$  cells/ml) cell density. Transgene expression was analyzed by flow  
 88 cytometry 48 hrs post-transduction. **(b)** Mean fluorescence intensity of transgene expression in  
 89 each cell type. **(c)** FACS analyses of the level of expression of membrane heparan sulfate  
 90 proteoglycan in various human cell types. **(d)** Transduction efficiency of AAV2 vectors in human  
 91 cell lines in the absence or the presence of heparin. Each cell type was transduced with TM-  
 92 scAAV6-CBAp-EGFP vector at an MOI of 5,000 vgs/cell at high ( $1 \times 10^7$  cells/ml) cell density, and  
 93 transgene expression was analyzed by flow cytometry 48 hrs post-transduction. **(e)** Mean  
 94 fluorescence intensity of transgene expression in each cell type

95

96 **Supplementary Table 1: Transduction efficiency of WT and mutant AAV2 and AAV6 serotype**  
 97 **vectors in primary human HSPCs from various donors.**

|                 | WT-<br>AAV2      | WT-<br>AAV6    | TM-<br>AAV6-    | WT-<br>AAV2       | QM-<br>AAV2-     | WT-<br>AAV6      | TM-<br>AAV6-    |
|-----------------|------------------|----------------|-----------------|-------------------|------------------|------------------|-----------------|
|                 | Low Cell Density |                |                 | High Cell Density |                  |                  |                 |
| <b>Donor #1</b> | ND               | 1.3%<br>5,090  | ND              | ND                | ND               | 19.4%<br>9,080   | ND              |
| <b>Donor #2</b> | 1.4%,<br>4,184   | 9.8%<br>6,904  | ND              | 7.2%<br>5,810     | 31.1%<br>15,672  | 27.0%<br>9,994   | 45.2%<br>25,373 |
| <b>Donor #3</b> | ND               | ND             | 28.6%,<br>8,246 | ND                | ND               | ND               | 58.5%<br>23,846 |
| <b>Donor #4</b> | 4.4%,<br>3,720   | 9.5%,<br>6,512 | ND              | 11.6%,<br>6,686   | 19.6%,<br>13,001 | 23.9%,<br>15,434 | ND              |

98  
 99 Primary human bone marrow-derived CD34<sup>+</sup> cells from various donors were transduced in  
 100 triplicate with the WT-AAV2, WT-AAV6, Y444+500+730F+T491T-AAV2 quadruple-mutant (QM),  
 101 or Y705+731F+T492V-AAV6 triple-mutant (TM) scAAV-EGFP vectors at an MOI of 3,000 vgs/cell.  
 102 Transgene expression was analyzed by flow cytometry 48 hrs post-transduction. Data are  
 103 presented as % EGFP positive cells, and EGFP mean fluorescence intensities.

104 ND = Not done.

105

106

107

108

109

110

111

112

113
